# Supplementary material for: Chronic Stress and Gonadectomy Affect the Expression of Cx37, Cx40 and Cx43 in the Spinal Cord
Source: MDPI journal article supplement (doi:10.3390/life11121330), 2021-12-01
Supplement: s1 [file s1]

Supplementary Table S2. Shapiro-Wilk test for normality of distribution

|                          |                  | F-SH-C                    | F-SH-S | F-Gx-C | F-Gx-S        | M-SH-C | M-SH-S | M-Gx-NS | M-Gx-S |
|--------------------------|------------------|---------------------------|--------|--------|---------------|--------|--------|---------|--------|
|                          |                  | Shapiro-Wilk test P value |        |        |               |        |        |         |        |
| <b>Dorsal<br/>horn</b>   | <b>Cx37</b>      | 0.5531                    | 0.4664 | 0.6098 | <b>0.0034</b> | 0.6954 | 0.8128 | 0.5418  | 0.8664 |
|                          | <b>Cx37/gfap</b> | 0.6721                    | 0.7550 | 0.8288 | <b>0.0013</b> | 0.5856 | 0.9709 | 0.2381  | 0.2642 |
|                          | <b>Cx40</b>      | 0.2294                    | 0.3121 | 0.6228 | 0.6882        | 0.8794 | 0.9355 | 0.7719  | 0.1780 |
|                          | <b>Cx40/gfap</b> | 0.8399                    | 0.6911 | 0.9740 | 0.9104        | 0.8768 | 0.0831 | 0.7010  | 0.2696 |
|                          | <b>Cx43</b>      | 0.1489                    | 0.8357 | 0.6197 | 0.3557        | 0.5321 | 0.0590 | 0.0936  | 0.6510 |
|                          | <b>Cx43/gfap</b> | 0.3479                    | 0.2837 | 0.6623 | 0.4158        | 0.2033 | 0.6404 | 0.9979  | 0.6754 |
| <b>Central<br/>canal</b> | <b>Cx37</b>      | 0.4108                    | 0.4809 | 0.3499 | 0.2489        | 0.7995 | 0.1241 | 0.6222  | 0.4769 |
|                          | <b>Cx37/gfap</b> | 0.2111                    | 0.6312 | 0.4468 | 0.2542        | 0.9506 | 0.1557 | 0.5258  | 0.4016 |
|                          | <b>Cx40</b>      | 0.1118                    | 0.2926 | 0.3909 | 0.2927        | 0.1262 | 0.5104 | 0.5452  | 0.6251 |
|                          | <b>Cx40/gfap</b> | 0.0596                    | 0.5025 | 0.6881 | 0.6348        | 0.0832 | 0.4997 | 0.7889  | 0.2470 |
|                          | <b>Cx43</b>      | 0.6666                    | 0.3184 | 0.9231 | 0.1170        | 0.4611 | 0.3460 | 0.7187  | 0.4336 |
|                          | <b>Cx43/gfap</b> | 0.8568                    | 0.4083 | 0.8660 | 0.5714        | 0.3802 | 0.4243 | 0.7808  | 0.6769 |
