# Supplementary material for: Chronic Stress and Gonadectomy Affect the Expression of Cx37, Cx40 and Cx43 in the Spinal Cord
Source: MDPI journal article supplement (doi:10.3390/life11121330), 2021-12-01
Supplement: s1 [file s1]

**Supplementary Table S1**

| <b>Antibody</b> | <b>Publication</b>                                                                                                                                                                                                                                                                                                                                                                                                                                                                                                                                                                                                                                                                                                                                                                                                                                                                                                                                                                                                                                                                                                                                                                                                                                                                                   | <b>Method</b>                            |
|-----------------|------------------------------------------------------------------------------------------------------------------------------------------------------------------------------------------------------------------------------------------------------------------------------------------------------------------------------------------------------------------------------------------------------------------------------------------------------------------------------------------------------------------------------------------------------------------------------------------------------------------------------------------------------------------------------------------------------------------------------------------------------------------------------------------------------------------------------------------------------------------------------------------------------------------------------------------------------------------------------------------------------------------------------------------------------------------------------------------------------------------------------------------------------------------------------------------------------------------------------------------------------------------------------------------------------|------------------------------------------|
| ab87645         | <ul style="list-style-type: none"><li>- Uribe P et al. Study on site-specific expression of bone formation and resorption factors in human dental follicles. Eur J Oral Sci 126:439-448 (2018).</li><li>- Shen Y et al. Connexin 43 SUMOylation improves gap junction functions between liver cancer stem cells and enhances their sensitivity to HSVtk/GCV. Int J Oncol 52:872-880 (2018).</li><li>- Shibata M et al. Involvement of glial cells in the autoregulation of optic nerve head blood flow in rabbits. Invest Ophthalmol Vis Sci 53:3726-32 (2012).</li><li>- Kosovic I et al. Spatio-temporal patterning of different connexins in developing and postnatal human kidneys and in nephrotic syndrome of the Finnish type (CNF). Sci Rep 10:8756 (2020).</li><li>- Kosovic I et al. Connexin Signaling in the Juxtaglomerular Apparatus (JGA) of Developing, Postnatal Healthy and Nephrotic Human Kidneys. Int J Mol Sci 21:8349 (2020).</li><li>- Juric M et al. Expression of Connexins 37, 43 and 45 in Developing Human Spinal Cord and Ganglia. Int J Mol Sci 21:9356 (2020).</li><li>- Lozic M et al. Alteration of Cx37, Cx40, Cx43, Cx45, Panx1, and Renin Expression Patterns in Postnatal Kidneys of Dab1<sup>-/-</sup> (yotari) Mice. Int J Mol Sci 22:1284 (2021).</li></ul> | Immunohistochemistry /Immunofluorescence |
|                 | <ul style="list-style-type: none"><li>- Zheng L et al. Phosphorylation of Cx43 residue Y313 by Src contributes to blocking the interaction with Drebrin and disassembling gap junctions. J Mol Cell Cardiol 126:36-49 (2019).</li></ul>                                                                                                                                                                                                                                                                                                                                                                                                                                                                                                                                                                                                                                                                                                                                                                                                                                                                                                                                                                                                                                                              | Western-blot                             |
| ab213688        | <ul style="list-style-type: none"><li>- Wan HJ et al. Propofol-induced vasodilation of mesenteric arterioles via BKCa channel and gap junction. Exp Ther Med 16:2960-2968 (2018).</li><li>- Kosovic I et al. Spatio-temporal patterning of different connexins in developing and postnatal human kidneys and in nephrotic syndrome of the Finnish type (CNF). Sci Rep 10:8756 (2020).</li><li>- Kosovic I et al. Connexin Signaling in the Juxtaglomerular Apparatus (JGA) of Developing, Postnatal Healthy and Nephrotic Human Kidneys. Int J Mol Sci 21:8349 (2020).</li></ul>                                                                                                                                                                                                                                                                                                                                                                                                                                                                                                                                                                                                                                                                                                                     | Immunohistochemistry /Immunofluorescence |

|          |                                                                                                                                                                                                                                                                                                                                                                                                                                                                                                                                                                                                                                                                                                                                                                                                                                                                                                                                                                                                                                                                                                             |                                          |
|----------|-------------------------------------------------------------------------------------------------------------------------------------------------------------------------------------------------------------------------------------------------------------------------------------------------------------------------------------------------------------------------------------------------------------------------------------------------------------------------------------------------------------------------------------------------------------------------------------------------------------------------------------------------------------------------------------------------------------------------------------------------------------------------------------------------------------------------------------------------------------------------------------------------------------------------------------------------------------------------------------------------------------------------------------------------------------------------------------------------------------|------------------------------------------|
|          | <p>- Lozic M et al. Alteration of Cx37, Cx40, Cx43, Cx45, Panx1, and Renin Expression Patterns in Postnatal Kidneys of Dab1<sup>-/-</sup> (yotari) Mice. Int J Mol Sci 22:1284 (2021).</p>                                                                                                                                                                                                                                                                                                                                                                                                                                                                                                                                                                                                                                                                                                                                                                                                                                                                                                                  |                                          |
| ab181701 | <p>- Jamalzaei P et al. Effects of Alginate Concentration and Ovarian Cells on In Vitro Development of Mouse Preantral Follicles: A Factorial Study. Int J Fertil Steril 13:330-338 (2020).</p> <p>- Choi D et al. Piezo1 incorporates mechanical force signals into the genetic program that governs lymphatic valve development and maintenance. JCI Insight 4:e125068 (2019).</p> <p>- Juric M et al. Expression of Connexins 37, 43 and 45 in Developing Human Spinal Cord and Ganglia. Int J Mol Sci 21:9356 (2020).</p> <p>- Kosovic I et al. Spatio-temporal patterning of different connexins in developing and postnatal human kidneys and in nephrotic syndrome of the Finnish type (CNF). Sci Rep 10:8756 (2020).</p> <p>- Kosovic I et al. Connexin Signaling in the Juxtaglomerular Apparatus (JGA) of Developing, Postnatal Healthy and Nephrotic Human Kidneys. Int J Mol Sci 21:8349 (2020).</p> <p>- Lozic M et al. Alteration of Cx37, Cx40, Cx43, Cx45, Panx1, and Renin Expression Patterns in Postnatal Kidneys of Dab1<sup>-/-</sup> (yotari) Mice. Int J Mol Sci 22:1284 (2021).</p> | Immunohistochemistry /Immunofluorescence |
|          | <p>- Sabry R et al. BPA and BPS Affect Connexin 37 in Bovine Cumulus Cells. Genes (Basel) 12:321. (2021).</p> <p>- Ugwu N et al. Cutaneous and hepatic vascular lesions due to a recurrent somatic GJA4 mutation reveal a pathway for vascular malformation. HGG Adv 2:100028 (2021).</p> <p>- Wang S et al. Contribution of Connexin Hemichannels to the Pathogenesis of Acute Lung Injury. Mediators Inflamm 2020:8094347 (2020).</p> <p>- Choi D et al. Piezo1 incorporates mechanical force signals into the genetic program that governs lymphatic valve development and maintenance. JCI Insight 4:e125068 (2019).</p> <p>- Lei R et al. Effects of Fullerenol Nanoparticles on Rat Oocyte Meiosis Resumption. Int J Mol Sci 19:699 (2018).</p>                                                                                                                                                                                                                                                                                                                                                       | Western-blot                             |
| sc-33673 | <p>- Wang YF et al. Hyposmolality differentially and spatiotemporally</p>                                                                                                                                                                                                                                                                                                                                                                                                                                                                                                                                                                                                                                                                                                                                                                                                                                                                                                                                                                                                                                   | Immunohistochemistry                     |

|  |                                                                                                                                                                                                                                                                                                                                                                                                                                                                                                                                                                                                                                                                                                                                                                                                                                                                                                                                                                                                                                                                                                                                                                                                                        |                     |
|--|------------------------------------------------------------------------------------------------------------------------------------------------------------------------------------------------------------------------------------------------------------------------------------------------------------------------------------------------------------------------------------------------------------------------------------------------------------------------------------------------------------------------------------------------------------------------------------------------------------------------------------------------------------------------------------------------------------------------------------------------------------------------------------------------------------------------------------------------------------------------------------------------------------------------------------------------------------------------------------------------------------------------------------------------------------------------------------------------------------------------------------------------------------------------------------------------------------------------|---------------------|
|  | <p>modulates levels of glutamine synthetase and serine racemase in rat supraoptic nucleus. <i>Glia</i> 61:529-538 (2013).</p> <p>- Torres A et al. Adenosine A3 receptor elicits chemoresistance mediated by multiple resistance-associated protein-1 in human glioblastoma stem-like cells. <i>Oncotarget</i> 7:67373-67386 (2016).</p> <p>- Kim YE et al. Inhibitory effect of punicalagin on lipopolysaccharide induced neuroinflammation, oxidative stress and memory impairment via inhibition of nuclear factor-kB. <i>Neuropharmacology</i> 117:21-32 (2017).</p> <p>- Miranda-Azpiazu P et al. A novel dynamic multicellular co-culture system for studying individual blood-brain barrier cell types in brain diseases and cytotoxicity testing. <i>Sci. Rep.</i> 8:8784 (2018).</p> <p>- Jianrong S et al. DUSP14 rescues cerebral ischemia/reperfusion (IR) injury by reducing inflammation and apoptosis via the activation of Nrf-2. <i>Biochem. Biophys. Res. Commun.</i> 509:713-721 (2019).</p> <p>- Ali W et al. Oral administration of a linoleic acid rescues A<math>\beta</math>induced glia-mediated neuroinflammation and cognitive dysfunction in C57BL/6N mice. <i>Cells</i> 9:667 (2020).</p> | /Immunofluorescence |
|  | <p>- Wang YF et al. Hyposmolality differentially and spatiotemporally modulates levels of glutamine synthetase and serine racemase in rat supraoptic nucleus. <i>Glia</i> 61:529-538 (2013).</p> <p>- Torres A et al. Adenosine A3 receptor elicits chemoresistance mediated by multiple resistance-associated protein-1 in human glioblastoma stem-like cells. <i>Oncotarget</i> 7:67373-67386 (2016).</p> <p>- Kim YE et al. Inhibitory effect of punicalagin on lipopolysaccharide induced neuroinflammation, oxidative stress and memory impairment via inhibition of nuclear factor-kB. <i>Neuropharmacology</i> 117:21-32 (2017).</p>                                                                                                                                                                                                                                                                                                                                                                                                                                                                                                                                                                            | Western-blot        |
|  | <p>- Miranda-Azpiazu P et al. A novel dynamic multicellular co-culture system for studying individual blood-brain barrier cell types in brain</p>                                                                                                                                                                                                                                                                                                                                                                                                                                                                                                                                                                                                                                                                                                                                                                                                                                                                                                                                                                                                                                                                      | Immunocytochemistry |

|                                                                                                                              |                                                                                                                                                                                                                                                                                                                                                                                                                                                                                                                                                                                                                                                                                                                                            |                                          |
|------------------------------------------------------------------------------------------------------------------------------|--------------------------------------------------------------------------------------------------------------------------------------------------------------------------------------------------------------------------------------------------------------------------------------------------------------------------------------------------------------------------------------------------------------------------------------------------------------------------------------------------------------------------------------------------------------------------------------------------------------------------------------------------------------------------------------------------------------------------------------------|------------------------------------------|
|                                                                                                                              | diseases and cytotoxicity testing. Sci. Rep. 8:8784 (2018).                                                                                                                                                                                                                                                                                                                                                                                                                                                                                                                                                                                                                                                                                |                                          |
| ab53554*<br><br><i>* It has been used in more than 230 published papers. We mention only several more recent references.</i> | - Pretz D et al. Hyperleptinemia as a contributing factor for the impairment of glucose intolerance in obesity. FASEB J 35:e21216 (2021).<br><br>- Zhang Z et al. Downregulation of LncRNA Gas5 inhibits apoptosis and inflammation after spinal cord ischemia-reperfusion in rats. Brain Res Bull 168:110-119 (2021).<br><br>- Xu W et al. Melanocortin 1 receptor attenuates early brain injury following subarachnoid hemorrhage by controlling mitochondrial metabolism via AMPK/SIRT1/PGC-1 $\alpha$ pathway in rats. Theranostics 11:522-539 (2021).<br><br>- Yao X et al. Neurotrophin exerts neuroprotective effects after spinal cord injury by inhibiting apoptosis and modulating cytokines. J Orthop Translat 26:74-83 (2021). | Immunohistochemistry /Immunofluorescence |
|                                                                                                                              | - Hendrix RD et al. Alzheimer amyloid- $\beta$ - peptide disrupts membrane localization of glucose transporter 1 in astrocytes: implications for glucose levels in brain and blood. Neurobiol Aging 97:73-88 (2021).                                                                                                                                                                                                                                                                                                                                                                                                                                                                                                                       | Immunocytochemistry                      |
